# Supplementary material
Source: publisher figshare collection journal article supplement (https://sage.figshare.com/ndownloader/files/14033378)
Supplement: Supplementary file 1 [file 14033378]

## Supplemental material

### Methods for autoantibodies' detection

Antinuclear antibodies (ANA) were detected by indirect immunofluorescence on HEp-2 cell monolayers (cut-off =1:160 considered as clinically significant), anti-extractable nuclear antigen antibodies (anti-ENA) by commercial immunoblotting (Euroimmun, Lübeck, Germany), anti-double stranded DNA antibodies (anti-dsDNA) by Farr's radioimmunological method or indirect immunofluorescence on Crithidia Luciliae substrate, complement fractions C3 and C4 by nephelometry, anti-cardiolipin (aCL) IgG and IgM by immunoenzymatic assay (Harris EN. The Second International anti-cardiolipin standardization workshop. The Kingston antiphospholipid antibody study (KAPS) group. Ann J Clin Pathol 1990; 94: 476-484), anti- $\beta$ 2 glycoprotein I (anti- $\beta$ 2GPI) IgG and IgM by immunoenzymatic assay (Balestrieri G, Tincani A, Spatola L, Allegri F, Prati E, Cattaneo R, et al. Anti- $\beta$ 2 glycoprotein I: a marker of antiphospholipid syndrome? Lupus 1995; 4: 122-130.), lupus anticoagulant (LA) by coagulation assay.

**Table. Clinical and immunological features at onset of 19 patients affected by Systemic Lupus Erythematosus**

| Variable                  | N=19 (%)     |
|---------------------------|--------------|
| Cutaneous involvement     | 10/19 (52.6) |
| Oral ulcers               | 4/19 (21)    |
| Renal involvement         | 7/19 (36.8)  |
| Articular involvement     | 13/19 (68.4) |
| Neurological involvement  | 1/19 (5.3)   |
| Pleuritis/pericarditis    | 5/19 (26.3)  |
| Hematological features    | 13/19 (68.4) |
| Antiphospholipid Syndrome | 1/19 (5.3)   |
| ANA positivity            | 19/19 (100)  |

|                                           |              |
|-------------------------------------------|--------------|
| Anti-dsDNA positivity                     | 10/19 (52.6) |
| Anti-ENA positivity                       | 12/19 (63.1) |
| Anti-CL IgG                               | 1/19 (5.3)   |
| Anti-CL IgM                               | 4/19 (21)    |
| Anti- $\beta$ 2-GPI IgG positivity (n=18) | 2/18 (11.1)  |
| Anti- $\beta$ 2-GPI IgM positivity (n=18) | 2/18 (11.1)  |
| Lupus anticoagulant positivity (n=18)     | 5/18 (27.7)  |
| C3 mg/dL, mean (SD)                       | 8.2 (19)     |
| C4 mg/dL, mean (SD)                       | 13.6 (6.9)   |
| SLEDAI, mean (SD)                         | 4 (3)        |
| SLICC Damage Index, mean (SD)             | 0.5 (0.9)    |
